# Supplementary material
Source: HighWire-hosted journal article supplement (https://sit.bmj.com/highwire/filestream/336/field_highwire_adjunct_files/0/bmjsit-2021-000088supp001_data_supplement.pdf)
Supplement: bmjsit-2021-000088supp001_data_supplement.pdf [file bmjsit-2021-000088supp001_data_supplement.pdf]

Supplementary Table 1: Performance assessment in CABG

| Ref No. | Author       | Country     | Journal                         | Year | Study design                               | Patient selection                                                          |                                   | Imaging techniques |                        |       |                                                                                                                                                                                                                                                                                                          | Endpoint measures                                                                                                                         |                                                                                                          | Adverse effects                                                                                                                                                                                          | Learning curve                                                                                                                                                                                                                                                                                                                                                                                                                                  | Cost analysis                                                                                                                                                                                                                                                                                                                                                                                                                                                         | Other comments                                                                                                                         | Ref. cited |               |                                                                                                                                                                                                                                                                                                                        |                                                                                                                                                                                                                                                                                                                                                                          |                                                       |                                                                                    |
|---------|--------------|-------------|---------------------------------|------|--------------------------------------------|----------------------------------------------------------------------------|-----------------------------------|--------------------|------------------------|-------|----------------------------------------------------------------------------------------------------------------------------------------------------------------------------------------------------------------------------------------------------------------------------------------------------------|-------------------------------------------------------------------------------------------------------------------------------------------|----------------------------------------------------------------------------------------------------------|----------------------------------------------------------------------------------------------------------------------------------------------------------------------------------------------------------|-------------------------------------------------------------------------------------------------------------------------------------------------------------------------------------------------------------------------------------------------------------------------------------------------------------------------------------------------------------------------------------------------------------------------------------------------|-----------------------------------------------------------------------------------------------------------------------------------------------------------------------------------------------------------------------------------------------------------------------------------------------------------------------------------------------------------------------------------------------------------------------------------------------------------------------|----------------------------------------------------------------------------------------------------------------------------------------|------------|---------------|------------------------------------------------------------------------------------------------------------------------------------------------------------------------------------------------------------------------------------------------------------------------------------------------------------------------|--------------------------------------------------------------------------------------------------------------------------------------------------------------------------------------------------------------------------------------------------------------------------------------------------------------------------------------------------------------------------|-------------------------------------------------------|------------------------------------------------------------------------------------|
|         |              |             |                                 |      |                                            | Subject                                                                    | N (cases)                         | Fluoroscopic agent | Dose                   | Route | Timing                                                                                                                                                                                                                                                                                                   | Imaging system                                                                                                                            | Quantitative measurement                                                                                 |                                                                                                                                                                                                          |                                                                                                                                                                                                                                                                                                                                                                                                                                                 |                                                                                                                                                                                                                                                                                                                                                                                                                                                                       |                                                                                                                                        |            | Main outcomes | Imaging accuracy/review rate                                                                                                                                                                                                                                                                                           | Clinical impact, change in intraoperative decision making                                                                                                                                                                                                                                                                                                                | Clinical impact, advantages in postoperative outcomes |                                                                                    |
| 1       | Ribeiro      | Canada      | Heart Surg Forum                | 2002 | Prospective                                | CABG or MIDCAB                                                             | 20                                | EG                 | 0.3 mL (0.5-0.8 mg/mL) | IV    | IV, via the aortic catheter, catheter, or via the catheter                                                                                                                                                                                                                                               | Visualization of coronary anatomy and grafts                                                                                              | 90%                                                                                                      | 7% graft revision                                                                                                                                                                                        | NA                                                                                                                                                                                                                                                                                                                                                                                                                                              | None                                                                                                                                                                                                                                                                                                                                                                                                                                                                  | NA                                                                                                                                     | None       | None          | Ribeiro DT, Burt M, Francis DM, et al. New and simplified method for coronary graft imaging during CABG. <i>Heart Surg Forum</i> . 2002;5(2):141-146.                                                                                                                                                                  |                                                                                                                                                                                                                                                                                                                                                                          |                                                       |                                                                                    |
| 2       | Balaramaniam | UK          | J Thorac Cardiovasc Surg        | 2004 | Prospective                                | CABG (on and off pump)                                                     | 280 (153 candidates)              | EG                 | Inst.0.03mg/kg weight  | IV    | Inst. the syringe in the OPCAB group or through the OPCAB group                                                                                                                                                                                                                                          | NA                                                                                                                                        | Assessment of intraoperative graft patency                                                               | 90% in patient, 90% in graft                                                                                                                                                                             | Eight (1.7%) grafts in 8 (4%) patients demonstrated no fluorescence within the cordons during image acquisition. The occluded grafts were revised, after which the grafts were reimaged and patency was confirmed with the IT system.                                                                                                                                                                                                           | NA                                                                                                                                                                                                                                                                                                                                                                                                                                                                    | None                                                                                                                                   | NA         | None          | Balaramaniam L, Abu-Obay Y, Anandakrishnan R, et al. Does off-pump coronary bypass surgery reduce the incidence of graft failure? <i>J Thorac Cardiovasc Surg</i> . 2004;128:220-224.                                                                                                                                  |                                                                                                                                                                                                                                                                                                                                                                          |                                                       |                                                                                    |
| 3       | Rothhuber    | Switzerland | Chest                           | 2004 | Prospective                                | Off-pump CABG, nonanastomotic                                              | 38 (124 grafts)                   | EG                 | 1.25-2.5mg             | IV    | Through the central venous line                                                                                                                                                                                                                                                                          | SPY NeoVascular                                                                                                                           | NA                                                                                                       | Assessment of the quality of fluorescence                                                                                                                                                                | 90%                                                                                                                                                                                                                                                                                                                                                                                                                                             | 5% graft revision                                                                                                                                                                                                                                                                                                                                                                                                                                                     | NA                                                                                                                                     | None       | None          | Rothhuber G, Handrick A, Ganten M, et al. Noninvasive intraoperative quality assessment in off-pump coronary artery bypass grafting. <i>Chest</i> . 2004;125(2):418-424.                                                                                                                                               |                                                                                                                                                                                                                                                                                                                                                                          |                                                       |                                                                                    |
| 4       | Takahashi    | Japan       | Interact Cardiovasc Thorac Surg | 2004 | Prospective                                | Off-pump CABG/ MIDCAB/ A/C OPCAB                                           | 72 (280 distal anastomoses)       | EG                 | 2.5 mg                 | IV    | Inst. the central venous line                                                                                                                                                                                                                                                                            | SPY NeoVascular                                                                                                                           | NA                                                                                                       | Visualization of anastomosis                                                                                                                                                                             | 100%                                                                                                                                                                                                                                                                                                                                                                                                                                            | 1.4% graft revision                                                                                                                                                                                                                                                                                                                                                                                                                                                   | NA                                                                                                                                     | None       | None          | Takahashi M, Ishikawa T, Higashimura K, Kashi Y. SPY: an innovative intraoperative imaging device to evaluate graft patency during off-pump coronary artery bypass grafting. <i>Interact Cardiovasc Thorac Surg</i> . 2004;3(1):41-45.                                                                                 |                                                                                                                                                                                                                                                                                                                                                                          |                                                       |                                                                                    |
| 5       | Balaramaniam | UK          | J Thorac Cardiovasc Surg        | 2005 | Prospective                                | CABG (on and off pump)                                                     | 100 (264 bypass grafts)           | EG                 | Inst. 0.60mg/kg        | IV    | Inst. the syringe in the OPCAB group or through the OPCAB group                                                                                                                                                                                                                                          | SPY NeoVascular                                                                                                                           | NA                                                                                                       | Assessment of graft patency                                                                                                                                                                              | 24 (9.5%) grafts in 70 (75%) patients had good flow in both IT and TTFM. 16 (3.3%) grafts in 18 (18%) patients had good flow only in TTFM. No grafts had poor IT flow but good TTFM flow.                                                                                                                                                                                                                                                       | Both intraoperative fluorescence imaging and reflow-time flowmetry confirmed postoperative flow. Flow in 10 (10%) patients did not meet the criteria for anastomosis. There was a 100% sensitivity for the detection of anastomotic stenosis. There was a 100% specificity for the detection of anastomotic stenosis. There was a 100% sensitivity for the detection of anastomotic stenosis. There was a 100% specificity for the detection of anastomotic stenosis. | NA                                                                                                                                     | None       | None          | None                                                                                                                                                                                                                                                                                                                   | None                                                                                                                                                                                                                                                                                                                                                                     | None                                                  | Comparison of IT with TTFM. <i>J Thorac Cardiovasc Surg</i> . 2005;129(2):315-320. |
| 6       | Yamada       | Japan       | J Thorac Cardiovasc Surg        | 2005 | Prospective                                | OPCAB (LITA-LAD graft)                                                     | 10 (10 grafts)                    | EG                 | 2mL                    | IV    | Directly into the ascending aorta just before the branchpoint                                                                                                                                                                                                                                            | SPY NeoVascular                                                                                                                           | NA                                                                                                       | Assessment of a LITA graft                                                                                                                                                                               | 100% for anastomosis                                                                                                                                                                                                                                                                                                                                                                                                                            | NA                                                                                                                                                                                                                                                                                                                                                                                                                                                                    | NA                                                                                                                                     | None       | None          | Yamada T, Watanabe G, Tomita K. Transcatheter intracardiac technique of fluorescence imaging: novel intraoperative assessment of anastomosis in off-pump coronary artery bypass grafting. <i>J Thorac Cardiovasc Surg</i> . 2005;130(2):560-561.                                                                       |                                                                                                                                                                                                                                                                                                                                                                          |                                                       |                                                                                    |
| 7       | Dixon        | Canada      | J Am Coll Cardiol               | 2005 | Prospective                                | CABG (on and off pump)                                                     | 120 (126 grafts)                  | EG                 | NA                     | NA    | In-line grafts on pump (2.5mg injection into aortic cannula), In-line grafts off pump (1.25 mg injection into central venous line), Free grafts distal anastomosis (0.125 mg dose), In-line grafts on pump (1.25 mg injection into central venous line after revascularization from cardioplegic bypass) | Injection into aortic cannula or central venous line. Direct graft injection before proximal anastomosis construction                     | NA                                                                                                       | Visualization of anastomosis                                                                                                                                                                             | Sensitivity and specificity of the ICG angiography for graft anastomosis 50% vs 100%, 4.2% major graft revision and 3.7% minor revision                                                                                                                                                                                                                                                                                                         | NA                                                                                                                                                                                                                                                                                                                                                                                                                                                                    | None                                                                                                                                   | None       | None          | As part of a pilot study investigating for IT, the authors report on the use of ICG angiography for anastomosis. The authors report on the use of ICG angiography for anastomosis. The authors report on the use of ICG angiography for anastomosis. The authors report on the use of ICG angiography for anastomosis. |                                                                                                                                                                                                                                                                                                                                                                          |                                                       |                                                                                    |
| 8       | Dixon        | Canada      | J Thorac Cardiovasc Surg        | 2006 | Prospective (within patient randomization) | CABG (on and off pump, elective and urgent)                                | 106 (110 grafts)                  | EG                 | NA                     | NA    | In-line grafts on pump (2.5mg injection into aortic cannula), In-line grafts off pump (1.25 mg injection into central venous line), Free grafts distal anastomosis (0.125 mg dose), In-line grafts on pump (1.25 mg injection into central venous line after revascularization from cardioplegic bypass) | Injection into aortic cannula or central venous line. Direct graft injection before proximal anastomosis construction                     | NA                                                                                                       | Assessment of grafts                                                                                                                                                                                     | Sensitivity, specificity, PPV, and NPV of ICG angiography to detect greater than 50% stenosis or occlusion was 83.7%, 100%, 100%, and 84.4% (IT); 27%, 98.4%, 90%, and 77.0% (TTFM).                                                                                                                                                                                                                                                            | ICG Angiography detected 17 (17%) graft stenoses including 7 cases that TTFM missed.                                                                                                                                                                                                                                                                                                                                                                                  | There were no significant differences in clinical outcomes between all or critical patients and those who underwent every angiography. | None       | None          | None                                                                                                                                                                                                                                                                                                                   | Comparison of IT with TTFM and every angiography. <i>J Thorac Cardiovasc Surg</i> . 2006;132(1):54-59.                                                                                                                                                                                                                                                                   |                                                       |                                                                                    |
| 9       | Handa        | Japan       | Interact Cardiovasc Thorac Surg | 2009 | Prospective                                | In-line OPCAB                                                              | 40 (110 grafts)                   | EG                 | NA                     | IV    | NA                                                                                                                                                                                                                                                                                                       | A non-invasive CCD camera system consisting of a combination of camera, filter, and optical fiber, and a high-resolution CCD image sensor | Fluorescence intensity                                                                                   | Assessment of graft and perfusion                                                                                                                                                                        | The sensitivity and the specificity of ICG angiography for graft failure was 100% and 100%, 1.7% graft revision                                                                                                                                                                                                                                                                                                                                 | NA                                                                                                                                                                                                                                                                                                                                                                                                                                                                    | None                                                                                                                                   | None       | None          | Handa T, Kawan RG, Saegusa S, San T. Preliminary experience for the evaluation of the intraoperative graft patency with real-time charge-coupled device camera system as anastomosis quality control during off-pump coronary artery bypass graft. <i>Interact Cardiovasc Thorac Surg</i> . 2009;8(2):150-154.         |                                                                                                                                                                                                                                                                                                                                                                          |                                                       |                                                                                    |
| 10      | Wanda        | US          | JACC Cardiovasc Imaging         | 2009 | Prospective                                | Off-pump CABG                                                              | 117 (87 grafts)                   | EG                 | 0.62mg                 | IV    | Through a central venous catheter                                                                                                                                                                                                                                                                        | SPY NeoVascular                                                                                                                           | NA                                                                                                       | Assessment of graft patency                                                                                                                                                                              | 378 (75%) grafts were visualized clearly up to the distal anastomosis.                                                                                                                                                                                                                                                                                                                                                                          | 1% graft revision                                                                                                                                                                                                                                                                                                                                                                                                                                                     | NA                                                                                                                                     | None       | None          | None                                                                                                                                                                                                                                                                                                                   | Wanda K, Abu J, Hasegawa T, et al. Comparison of the usefulness of fluorescence imaging system for on-line assessment of off-pump coronary artery bypass graft. <i>JACC Cardiovasc Imaging</i> . 2009;2(10):841-842.                                                                                                                                                     |                                                       |                                                                                    |
| 11      | Smith        | Canada      | J Thorac Cardiovasc Surg        | 2010 | RCT                                        | CABG (on and off pump)                                                     | 78 (234 grafts / 173 (234) cases) | EG                 | NA                     | IV    | In-line IT analysis, the graft occlusion was classified as either the anastomosis, the graft, or the anastomosis. In-line IT analysis, the graft occlusion was classified as either the anastomosis, the graft, or the anastomosis.                                                                      | Injection into aortic cannula or central venous line. Direct graft injection before proximal anastomosis construction                     | NA                                                                                                       | Postoperative graft patency                                                                                                                                                                              | NA                                                                                                                                                                                                                                                                                                                                                                                                                                              | 1.7% graft revision                                                                                                                                                                                                                                                                                                                                                                                                                                                   | NA                                                                                                                                     | None       | None          | None                                                                                                                                                                                                                                                                                                                   | One-year angiography was performed in 107 patients (imaging, 55 patients; 100 grafts; control, 47 patients; 112 grafts). The proportion of patients with 1 graft occlusion was more comparable in the imaging group (1.7%) and control (1.7%) groups (100% vs 100% respectively). In the imaging group, 1.1 (1.1%) vs 0.2 (0.2%) were other graft patency and occlusion. |                                                       |                                                                                    |
| 12      | Handa        | Japan       | Gen Thorac Cardiovasc Surg      | 2011 | Prospective                                | In-line CABG (on and off pump)                                             | 4 (19 anastomosis via grafts)     | EG                 | NA                     | IV    | NA                                                                                                                                                                                                                                                                                                       | SPY NeoVascular                                                                                                                           | NA                                                                                                       | Diagnostic accuracy to determine graft failure                                                                                                                                                           | The IT system demonstrated a satisfactory flow of all grafts, while postoperative X-ray angiography demonstrated that one (5%) was 70% occluded (the others were patent).                                                                                                                                                                                                                                                                       | NA                                                                                                                                                                                                                                                                                                                                                                                                                                                                    | None                                                                                                                                   | None       | None          | Handa A, Ohsumi Y, Kuroki M, et al. Comparison of the usefulness of the ITM workflow on preoperative and intraoperative assessment of anastomosis quality control during off-pump coronary artery bypass and off-pump CABG. <i>Gen Thorac Cardiovasc Surg</i> . 2011;19(1):14-18.                                      |                                                                                                                                                                                                                                                                                                                                                                          |                                                       |                                                                                    |
| 13      | Koyanagi     | Japan       | Innovations (Phd)               | 2012 | Prospective                                | OPCAB                                                                      | 159 (40 grafts)                   | EG                 | NA                     | IV    | Inst. the SVC                                                                                                                                                                                                                                                                                            | NA                                                                                                                                        | NA                                                                                                       | Assessment of graft                                                                                                                                                                                      | NA                                                                                                                                                                                                                                                                                                                                                                                                                                              | 2 grafts (0.5%) were revised by ICG fluorescence angiography after TTFM.                                                                                                                                                                                                                                                                                                                                                                                              | NA                                                                                                                                     | None       | None          | None                                                                                                                                                                                                                                                                                                                   | Koyanagi M, Ohtsuka E, Nakamura H, et al. Efficacy of intraoperative fluorescence imaging system for anastomosis quality control during off-pump coronary artery bypass grafting. <i>Surg Today</i> . 2012;42(10):842-846.                                                                                                                                               |                                                       |                                                                                    |
| 14      | Ferguson     | US          | J Thorac Cardiovasc Surg        | 2013 | Prospective                                | CABG (on and off pump)                                                     | 167 (160 grafts)                  | EG                 | NA                     | IV    | NA                                                                                                                                                                                                                                                                                                       | The near infrared fluorescent (NIRF) system with a camera, angiography and perfusion monitor                                              | Fluorescence intensity                                                                                   | Identification of the anastomosis                                                                                                                                                                        | All 159 grafts were widely patent by angiography, and 24% of the anastomosis and 22% of the anastomosis were grafts showed an regional area of perfusion change in response to bypass grafting. In 16 (10%) of the anastomosis area, grafts showed an regional area of perfusion change in response to bypass grafting. In 16 (10%) of the anastomosis area, grafts showed an regional area of perfusion change in response to bypass grafting. | NA                                                                                                                                                                                                                                                                                                                                                                                                                                                                    | None                                                                                                                                   | None       | None          | None                                                                                                                                                                                                                                                                                                                   | Ferguson TR, Jr, Choi C, Bahi DS, et al. Intraoperative near-infrared fluorescence imaging system for anastomosis quality control during off-pump coronary artery bypass grafting. <i>Surg Today</i> . 2013;43(10):1143-1148.                                                                                                                                            |                                                       |                                                                                    |
| 15      | Yamamoto     | Japan       | Surg Today                      | 2013 | Prospective                                | CABG (on and off pump, elective and urgent)                                | 40 (44 grafts)                    | EG                 | 0.05 mg/kg             | IV    | Via a central venous catheter                                                                                                                                                                                                                                                                            | HyperVascular System (HMS)                                                                                                                | Visualization of the bypass flow in production of graft patency                                          | Negative predictive value and positive predictive value of HMS angiography for anastomosis graft occlusion were 97.7% and 81.8%, respectively. These values for TTFM were 92.5% and 20.0%, respectively. | None                                                                                                                                                                                                                                                                                                                                                                                                                                            | None                                                                                                                                                                                                                                                                                                                                                                                                                                                                  | None                                                                                                                                   | None       | None          | Yamamoto M, Ohtsuka E, Nakamura H, et al. Efficacy of intraoperative fluorescence imaging system for anastomosis quality control during off-pump coronary artery bypass grafting. <i>Surg Today</i> . 2013;43(10):1143-1148.                                                                                           |                                                                                                                                                                                                                                                                                                                                                                          |                                                       |                                                                                    |
| 16      | Yamamoto     | Japan       | Surg Today                      | 2017 | Retrospective                              | CABG                                                                       | 101 (77 grafts)                   | EG                 | 0.05 mg/kg             | IV    | Via a central venous catheter                                                                                                                                                                                                                                                                            | HMS                                                                                                                                       | Fluorescence intensity the increasing rate of ICG intensity, energy accumulation value, and time to peak | Detection of grafts at risk of occlusion.                                                                                                                                                                | The quantitative HMS assessment showed negative and positive predictive values of 100 and 81% in ITA graft and 85% and 98.8% in SV grafts, respectively.                                                                                                                                                                                                                                                                                        | None                                                                                                                                                                                                                                                                                                                                                                                                                                                                  | None                                                                                                                                   | None       | None          | Yamamoto M, Nakamura H, Handa T, et al. Quantitative assessment technique of HyperVascular System for anastomosis quality control during off-pump coronary artery bypass grafting. <i>Surg Today</i> . 2017;47(2):176-179.                                                                                             |                                                                                                                                                                                                                                                                                                                                                                          |                                                       |                                                                                    |
| 17      | Nakamura     | Japan       | Innovations (Phd)               | 2018 | Retrospective                              | Robot-assisted minimally-invasive direct coronary artery bypass (R-MIDCAB) | 30                                | EG                 | 2.5mg                  | IV    | Through a central line                                                                                                                                                                                                                                                                                   | Fluorescence Imaging (FIM) 2A                                                                                                             | Assessment of LITA quality                                                                               | Sensitivity was 100%                                                                                                                                                                                     | 7% modifications in surgical procedure                                                                                                                                                                                                                                                                                                                                                                                                          | None                                                                                                                                                                                                                                                                                                                                                                                                                                                                  | None                                                                                                                                   | None       | None          | Nakamura Y, Kamada M, Ito Y, et al. LITA quality assessment by FIM 2A. <i>Fluorescence Imaging (FIM) 2A</i> . <i>Interact Cardiovasc Thorac Surg</i> . 2018;17(4):441-445.                                                                                                                                             |                                                                                                                                                                                                                                                                                                                                                                          |                                                       |                                                                                    |

NA, not available or not assessed
